# Supplementary material for: Osthole Antagonizes Microglial Activation in an NRF2-Dependent Manner
Source: MDPI journal article supplement (doi:10.3390/molecules28020507), 2023-01-04
Supplement: s1 [file s1]

# **Osthole Antagonizes Microglial Activation in an NRF2-Dependent Manner**

**Chuan-Hsiu Liu <sup>1,2,†</sup>, Mei-Ying Chen <sup>3,†</sup>, Yueh-Hsiung Kuo <sup>4,5,6</sup>, Jack Cheng <sup>3,7</sup>, Li-Zhong Chang <sup>3</sup>,**

**Meng-Shiun Chang <sup>3</sup>, Tsai-Ni Chuang <sup>3</sup>, Wen-Tsong Hsieh <sup>4,8</sup>, Yan-Ru Xiao <sup>8</sup>, Bor-Tsang Wu <sup>9</sup>, Wei-Yong Lin <sup>3,7,\*</sup> and Hsin-Ping Liu <sup>10,\*</sup>**

**1 Graduate Institute of Chinese Medicine, China Medical University, Taichung 40402, Taiwan**

**2 School of Chinese Medicine, China Medical University, Taichung 40402, Taiwan**

**3 Graduate Institute of Integrated Medicine, College of Chinese Medicine, China Medical University, Taichung 40402, Taiwan**

**4 Department of Chinese Pharmaceutical Sciences and Chinese Medicine Resources, College of Chinese Medicine, China Medical University, Taichung 40402, Taiwan**

**5 Department of Biotechnology, Asia University, Taichung 41354, Taiwan**

**6 Chinese Medicine Research Center, China Medical University, Taichung 40402, Taiwan**

**7 Department of Medical Research, China Medical University Hospital, Taichung 40447, Taiwan**

**8 School of Medicine and Department of Pharmacology, China Medical University, Taichung 40402, Taiwan**

**9 Department of Senior Service Management, National Taichung University of Science and Technology, Taichung City, 40343**

**10 Graduate Institute of Acupuncture Science, College of Chinese Medicine, China Medical University, Taichung 40402, Taiwan**

**\* Correspondence: linwy@mail.cmu.edu.tw (W.-Y.L.); hpliu@mail.cmu.edu.tw (H.-P.L.); Tel.: +886-4-22053366#3310 (W.-Y.L.)**

**† These authors contributed equally to this work.**

**Supplementary Table S1.** The primers used in this study.

| <b>Organism</b> | <b>Gene</b>  | <b>Forward primer</b>    | <b>Reverse primer</b>    |
|-----------------|--------------|--------------------------|--------------------------|
| Fruit fly       | Gapdh        | GAAAAAGCGGCAGTCGTAAT     | AATCCGATCTTCGACATGG      |
|                 | Drpr         | TGTGATCATGGTTACGGAGGAC   | CAGCCGGGTGGGCAA          |
|                 | CED          | CGTTTACAAGGAGCGACT       | TTCCCAGATTGAAGAGCAGG     |
|                 | Rpl32        | CGGATCGATATGCTAAGCTGT    | CGACGCACTCTGTTGTCG       |
|                 | Sod1         | CCTCACCGGAGACCTTCAC      | CAAGGGCACGGTTTTCTTC      |
|                 | Sod2         | AATTTGCAAACTGCAAGC       | TGATGCAGCTCCATGATCTC     |
|                 | Sod3         | TCAGCATGGGTGCTCACTAT     | TAATGCCCCGTGGAGTTGG      |
|                 | Cat          | TGACTACAAAACTCCCAAACG    | TTGATTCCAATGGGTGCTC      |
|                 | CG15116      | ACCGTTCGAGATACGTTTGG     | CGCAAACCGTTGTACTGAGA     |
|                 | PHGPx        | TGACATCGGCGAGGTGT        | CGGTCTGCTTGGCCTTTA       |
|                 | Cnc          | GCCAACTATGGTGGTGGAGT     | ACGCTGCGATTGAGACG        |
| Mouse           | Actin        | CATGAAGATCCTGACCGAGCGTG  | TCTGCTGGAAGGTGGACAGTGAGG |
|                 | Nrf2         | TTCTTTCAGCAGCATCCTCTCCAC | ACAGCCTTCAATAGTCCCGTCCAG |
|                 | IL1b         | CTTCCTTGTGCAAGTGTCTG     | CAGGTCATTCTCATCACTGTC    |
|                 | Tnf $\alpha$ | AAATTCGAGTGACAAGCCTGTAG  | GAGAACCTGGGAGTAGACAAGGT  |
|                 | Ccl2         | GGGATCATCTTGCTGGTGAA     | AGGTCCCTGTCATGCTTCTG     |
|                 | Ccl3         | GTGGAATCTTCCGGCTGTAG     | ACCATGACACTCTGCAACCA     |
|                 | Cxcl1        | CTTGACCCTGAAGCTCCCTT     | AGGTGCCATCAGAGCAGTCT     |
|                 | Ccl4         | GCTCTGTGCAAACCTAACCC     | GAAACAGCAGGAAGTGGGAG     |
|                 | Ccl12        | TCCTCAGGTATTGGCTGGAC     | CGGACGTGAATCTTCTGCTT     |
